# Supplementary material
Source: PubMed Central journal article supplement (PMC2556819)
Supplement: pp.108.119396_3.pdf [file pp.108.119396_3.pdf]

**Table S1. Segregation of double mutants**

| genotype,<br>parental plants | phenotype, offspring |                                |                              |              |           |
|------------------------------|----------------------|--------------------------------|------------------------------|--------------|-----------|
|                              | <i>WT</i>            | <i>mp</i>                      | <i>pin1</i>                  | <i>novel</i> | total     |
| <i>mp/+ pin1/+</i>           | 425 (61)             | 102 (15)                       | 122 (18)                     | 44 (6)       | 693 (100) |
| <i>mp/+ pid/+</i>            | 247 (57)             | 82 (19)                        | <u><i>pid</i></u><br>77 (18) | 24 (6)       | 430 (100) |
| <i>pin/+ pid/+</i>           | 468 (57)             | <u><i>pin1</i></u><br>165 (20) | 132 (16)                     | 50 (6)       | 815 (100) |
| expected (%)                 | 56                   | 19                             | 19                           | 6            | 100       |
