# Supplementary material
Source: PubMed Central journal article supplement (PMC2556819)

DAG

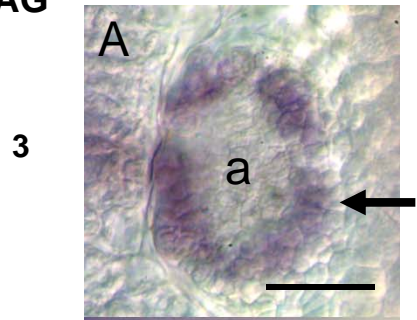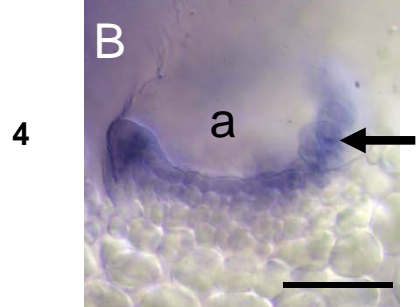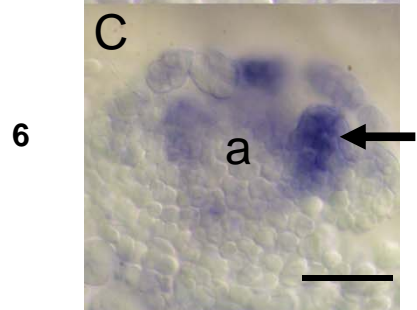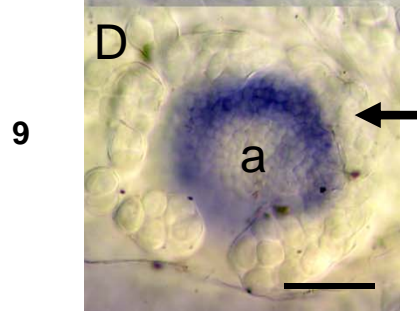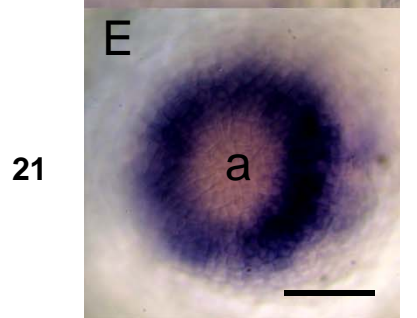

Supplement: pp.108.119396_1.pdf [file pp.108.119396_1.pdf]

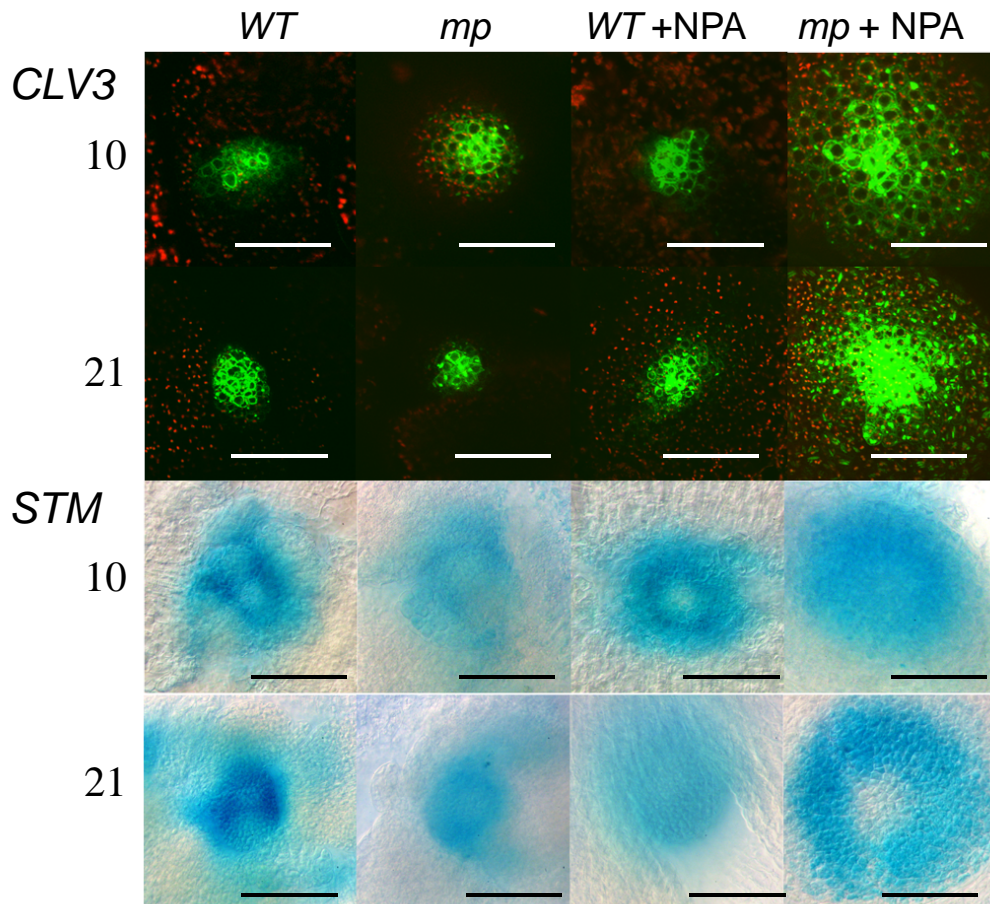

Supplement: pp.108.119396_2.pdf [file pp.108.119396_2.pdf]
